# Supplementary material for: Metabolomic analysis of sun exposed skin
Source: Royal Society of Chemistry journal article supplement (doi:10.1039/c3mb25537a), 2013-04-16

**Novelty of work:** To the best of our knowledge, this is the first metabolomic comparison of biological responses produced in terms of metabolites produced in chronically sun exposed skin as compared to sun protected skin.

**Changes made to the original document:**

- 1) To the material and method section information on CMTRX samples is added from line 23 to line 31 under sample preparation.
- 2) To the material and method section information on CMTRX samples is added from line 33 to line 41 under sample analysis.
- 3) Single line added on statistical analysis on page no. 4, line 5.
- 4) Figure 1 added on page no. 5
- 5) To the results and discussion section finding from Hu et al., added from line 61 to 71.
- 6) To the conclusion section novelty of the work added from line 39 to 42.

**Supplemental Figure 3:** Biochemical levels are represented for unexposed (1) and exposed (2) skin for each individual in the study. Each individual is represented by a different line which connects the two samples from the subject.

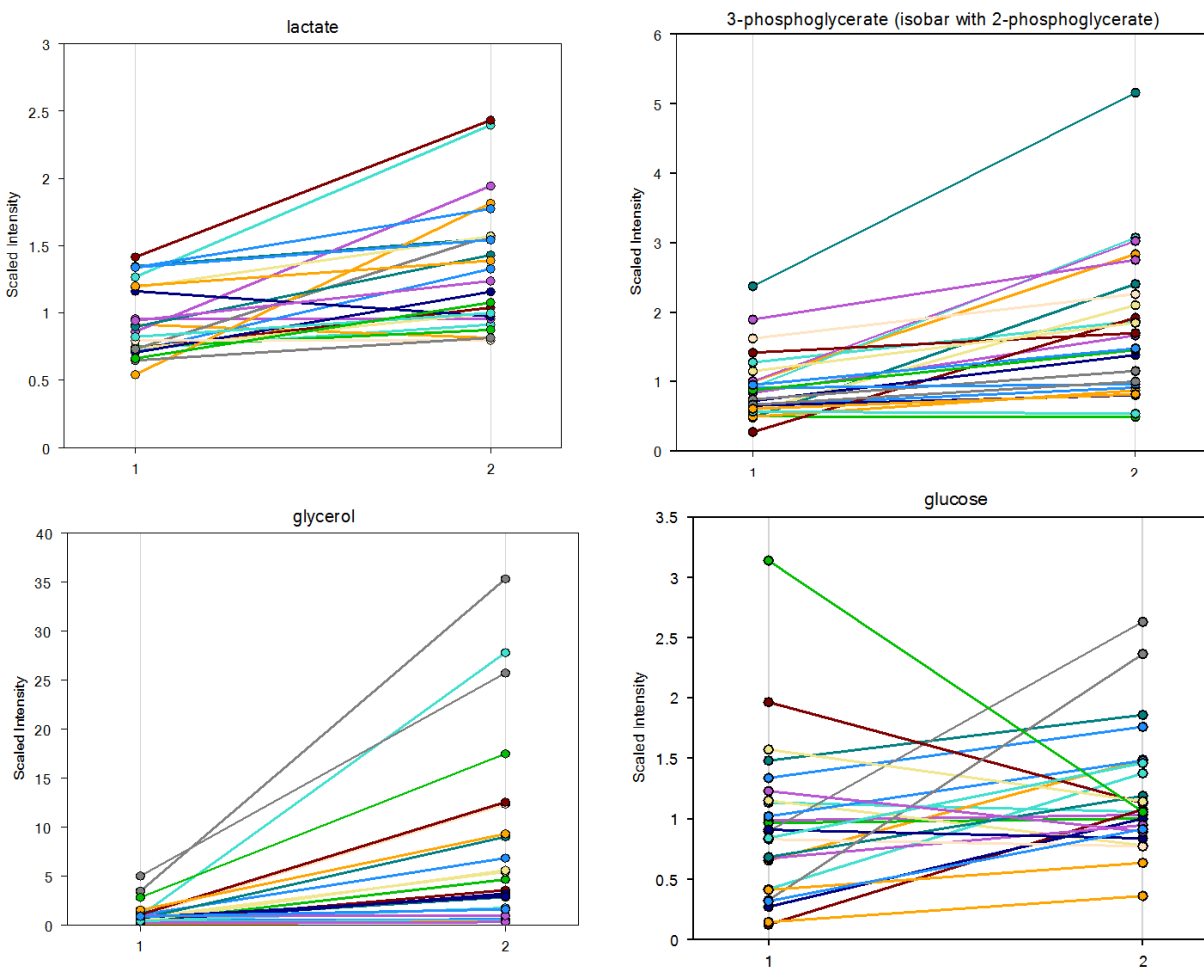

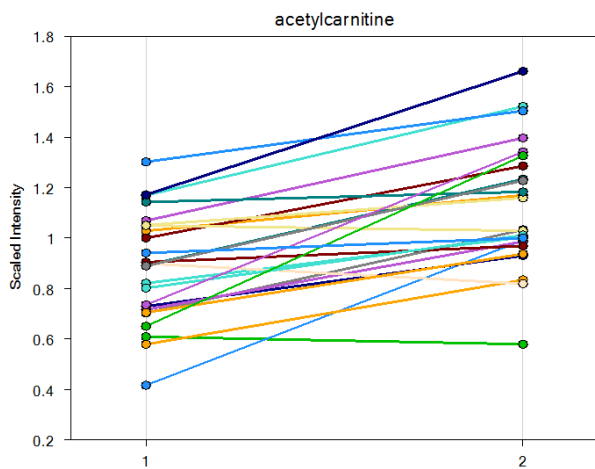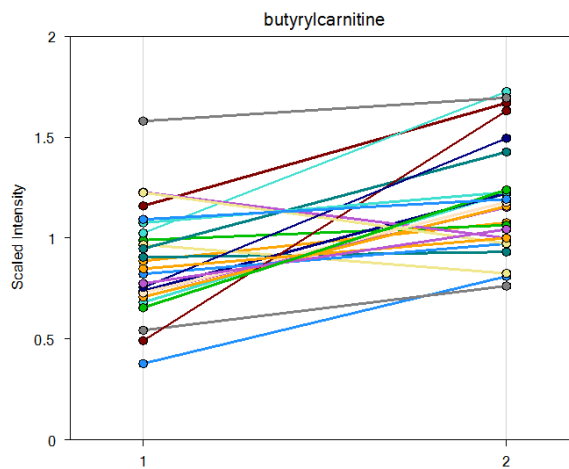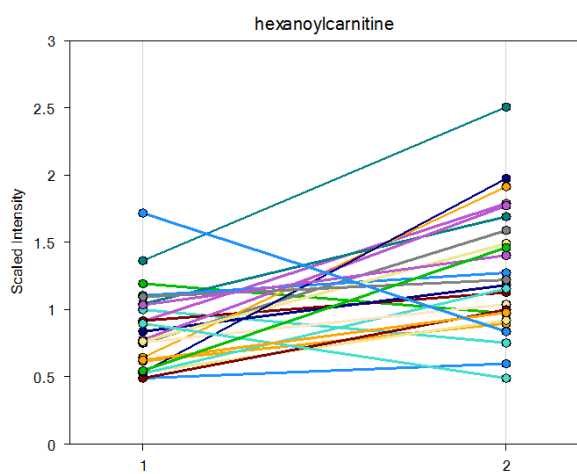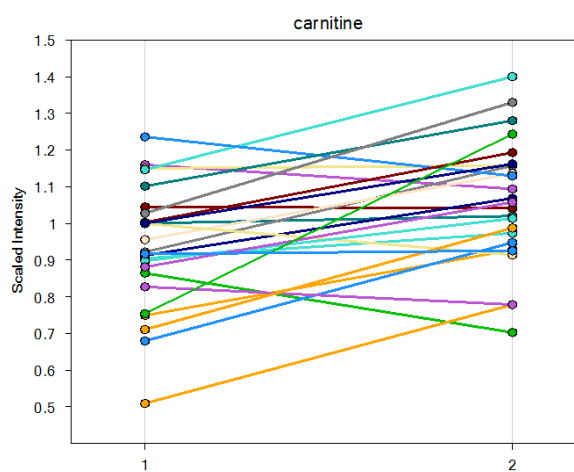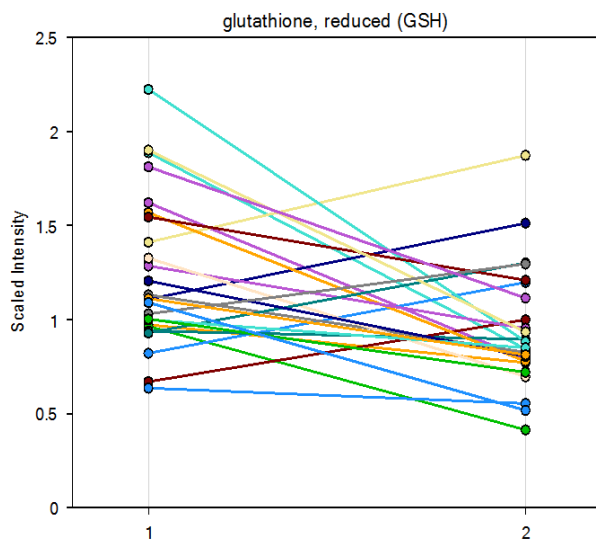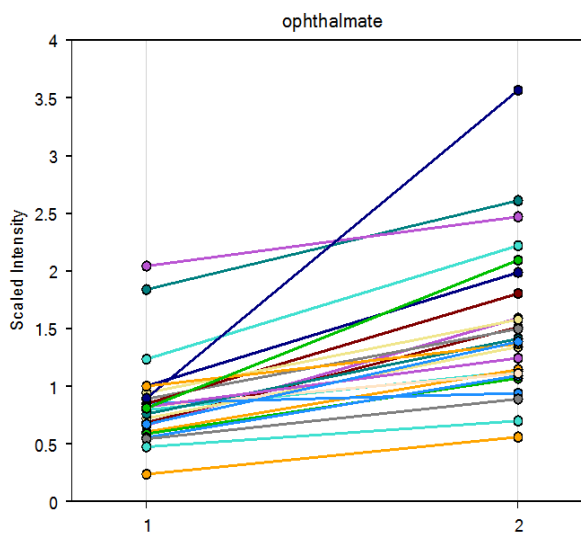

Supplement: c3mb25537a.pdf [file c3mb25537a.pdf]
